# Supplementary material
Source: PubMed Central journal article supplement (PMC7656284)

## Supplemental Online Content

Bischoff-Ferrari HA, Vellas B, Rizzoli R, et al; DO-HEALTH Research Group. Effect of vitamin D supplementation, omega-3 fatty acid supplementation, or a strength-training exercise program on clinical outcomes in older adults: the DO-HEALTH randomized clinical trial. *JAMA*. Published November 10, 2020. doi:10.1001/jama.2020.16909

**eTable 1.** Pre-defined Primary, Secondary, Exploratory, and Biomarkers Outcomes in DO-HEALTH

**eTable 2.** Post Hoc Analysis Using Multiply Imputed Data and Site Random Effects

**eTable 3.** Mortality and Nursing Home Admission in the 3-Year Follow-up of DO-HEALTH by Treatment Group

**eTable 4.** Adherence to the Study Medication and Exercise Programs [n, (%)] in DO-HEALTH by Treatment Group

**eTable 5.** Average Absolute Changes in Serum 25(OH)D, DHA, and EPA Levels in the Main Effects Groups

**eTable 6.** Effects of Treatments on Type of Infections in the 3-Year Follow-up of DO-HEALTH by Treatment Group

**eTable 7.** P-Values for Interactions

**eTable 8.** Mean Calcium, Parathyroid Hormone (PTH), and Estimated Glomerular Filtration Rate (eGFR) Levels in the 3 Year Follow-up of DO-HEALTH by Treatment Group

**eTable 9.** Adverse Events in the DO-HEALTH by Treatment Group

**eFigure 1.** Serum Changes in 25(OH)D, DHA and EPA by the 8 Treatment Arms

**eFigure 2A.** Subgroup Analysis of Effect of Treatment on Systolic Blood Pressure and Infections by Sex and Age

**eFigure 2B.** Subgroup Analysis of Effect of Treatment on Systolic Blood Pressure and Infections by Baseline Levels of 25(OH)D and Median Levels of DHA and EPA

This supplemental material has been provided by the authors to give readers additional information about their work.

**eTable 1. Pre-defined Primary, Secondary, Exploratory, and Biomarkers Outcomes in DO-HEALTH**

| Endpoints       | Outcomes                                                                                                                                                                                                                                                   | Time frame                     |
|-----------------|------------------------------------------------------------------------------------------------------------------------------------------------------------------------------------------------------------------------------------------------------------|--------------------------------|
| Cardio-vascular | Primary: Systolic and diastolic blood pressure change, measured with a standardized blood pressure assessment in sitting position <sup>1</sup>                                                                                                             | Baseline, 12, 24 and 36 months |
|                 | Secondary: Incident Hypertension                                                                                                                                                                                                                           | Over 36 months                 |
|                 | Exploratory:<br>1. Major cardio-vascular events as a composite endpoint (any event: myocardial infarction, stroke, revascularization procedures of CABG and PCI, incident congestive heart disease, cardiovascular mortality) confirmed by medical records | Over 36 months                 |
|                 | 2. Individual major cardio-vascular endpoints (myocardial infarction, stroke, incident congestive heart disease, and cardiovascular mortality) confirmed by medical records                                                                                | Every 3 months over 36 months  |
| Bone            | Primary*: Incident non-vertebral fractures, assessed every 3 months (4 visits, 9 phone calls) and confirmed by medical and/or x-ray reports                                                                                                                | Over 36 months                 |
|                 | Secondary:<br>1. Incident hip fractures, assessed every 3 months (4 visits, 9 phone calls) and based on medical records and/or x-ray reports                                                                                                               | Over 36 months                 |
|                 | 2. Incident total fractures, combined non-vertebral and vertebral fractures among subgroup of 1503 participants with DXA vertebral morphometry assessment                                                                                                  | Over 36 months                 |
|                 | 3. Incident vertebral fractures based on DXA vertebral morphometry assessment among 1503 participants with DXA vertebral morphometry assessment                                                                                                            | Over 36 months                 |
|                 | 4. Bone mineral density decrease at the lumbar spine and hip based on DXA vertebral morphometry among subset of 1503 participants                                                                                                                          | Over 36 months                 |
|                 | Exploratory:<br>1. Incident repeat fractures: any repeat non-vertebral fractures in all participants, vertebral fractures and total fractures among subset of 1503 participants with yearly DXA measurements                                               | Over 36 months                 |
|                 | 2. Functional recovery after long bone fracture                                                                                                                                                                                                            | Over 36 months                 |

|          |                                                                                                                                                                                                                                                        |                                              |
|----------|--------------------------------------------------------------------------------------------------------------------------------------------------------------------------------------------------------------------------------------------------------|----------------------------------------------|
| Muscle   | Primary*: Functional decline (lower extremity function), measured with the Short Physical Performance Battery (SPPB) <sup>2</sup>                                                                                                                      | Baseline, 12, 24, and 36 months              |
|          | Secondary:<br>1. Rate of falls (any low trauma fall, injurious fall)                                                                                                                                                                                   | Assessed every 3 months over 36 months       |
|          | 2. Reaction time assessed with the repeated sit-to-stand test (5 repeats as part of the SPPB <sup>2</sup> )                                                                                                                                            | Baseline, 12, 24, and 36 months              |
|          | 3. Grip strength assessed with the Martin Vigorimeter <sup>3</sup>                                                                                                                                                                                     | Baseline, 12, 24, and 36 months              |
|          | 4. Muscle mass decrease at upper and lower extremities among 1503 participants with DXA measurements                                                                                                                                                   | Baseline, 12, 24, and 36 months              |
|          | 5. Dual tasking 10-meter gait speed                                                                                                                                                                                                                    | Baseline, 12, 24, and 36 months              |
|          | 6. Musculoskeletal pain assessed with the McGill questionnaire <sup>4</sup>                                                                                                                                                                            | Baseline, 12, 24, and 36 months              |
|          | Exploratory:<br>1. Incident sarcopenia among subset of 1503 participants with yearly DXA measurements                                                                                                                                                  | Over 36 months                               |
|          | 2. Decline in physical activity assessed by an excerpt from the Nurses' Health Study (NHS) questionnaire <sup>5</sup>                                                                                                                                  | Over 36 months                               |
| Brain    | Primary: Cognitive decline assessed by the Montreal Cognitive Assessment (MoCA) <sup>6</sup>                                                                                                                                                           | Baseline, 12, 24 and 36 months               |
|          | Secondary:<br>1. Mental health decline assessed with an <i>excerpt</i> from the Geriatric Depression Scale (GDS) <sup>7,8</sup>                                                                                                                        | Baseline, 12, 24 and 36 months               |
|          | 2. Incident Depression assessed with an <i>excerpt</i> from the Geriatric Depression Scale (GDS) <sup>7,8</sup>                                                                                                                                        | Over 36 months                               |
|          | 3. Dual tasking gait variability assessed gait analyses and dual task assessments (GAITRite® Platinum, CIR Systems, PA, USA) in a subset of 250 participants. Participants performed 4 walking tasks with and without cognitive challenge <sup>9</sup> | Baseline, 12, 24 and 36 months               |
|          | Exploratory: incident dementia, any new diagnosis of dementia (self-reported or proxy-reported) confirmed by medical records                                                                                                                           | Over 36 months                               |
| Immunity | Primary: Rate of any infections, incidence of infections assessed every 3 months by a standardized infection protocol and questionnaire <sup>10,11</sup>                                                                                               | Baseline, and every 3 months up to 36 months |
|          | Secondary:                                                                                                                                                                                                                                             |                                              |

|           |                                                                                                                                                                                                                                                                                                                                                                                                |                                |
|-----------|------------------------------------------------------------------------------------------------------------------------------------------------------------------------------------------------------------------------------------------------------------------------------------------------------------------------------------------------------------------------------------------------|--------------------------------|
|           | 1. Rate of upper respiratory infections and rate of flu-like illness assessed every 3 months by a standardized infection protocol and questionnaire <sup>10,11</sup>                                                                                                                                                                                                                           | Over 36 months                 |
|           | 2. Incident severe infections that lead to hospital admission assessed every 3 months by a standardized infection protocol and questionnaire <sup>10,11</sup>                                                                                                                                                                                                                                  | Over 36 months                 |
|           | Exploratory:<br>1. Incident cancer (any cancer, gastro-intestinal, breast cancer in women, prostate cancer in men) assessed every 3 months and confirmed by medical records                                                                                                                                                                                                                    | Over 36 months                 |
|           | 2. Rate of implant infections after total hip or knee replacement (due to fracture or osteoarthritis) assessed every 3 months and confirmed by medical records                                                                                                                                                                                                                                 | Over 36 months                 |
|           | 3. Rate of gastro-intestinal infections assessed every 3 months and confirmed by medical records                                                                                                                                                                                                                                                                                               | Over 36 months                 |
| Cartilage | Secondary:<br>1. Severity of knee pain in participants with symptomatic knee osteoarthritis, assessed with the Knee injury and Osteoarthritis Outcome Score (KOOS) <sup>12</sup> questionnaire. Knee OA assessment with modified ACR criteria.                                                                                                                                                 | Baseline, 12, 24 and 36 months |
|           | 2. Rate of knee buckling, questionnaire-based <sup>13</sup>                                                                                                                                                                                                                                                                                                                                    | Baseline, 12, 24 and 36 months |
|           | 3. NSAID use and number of joints with pain assessed by questionnaire and homunculus figure                                                                                                                                                                                                                                                                                                    | Baseline, 12, 24 and 36 months |
|           | Exploratory:<br>1. Incident osteoarthritis: Incident symptomatic knee osteoarthritis ; incident symptomatic hip osteoarthritis; incident symptomatic hand osteoarthritis. Incident hip and knee OA was assessed based on clinical examination (modified ACR criteria for hip <sup>14</sup> and knee OA <sup>15</sup> ) and specific questionnaires (KOOS <sup>12</sup> , HOOS <sup>16</sup> ). | Baseline, 12, 24 and 36 months |
|           | 2. Composite endpoint: incident symptomatic knee, hip or hand osteoarthritis                                                                                                                                                                                                                                                                                                                   | Baseline, 12, 24 and 36 months |
|           | 3. severity of hip pain in those with prevalent symptomatic hip osteoarthritis <b>assessed by the Hip</b> injury and Osteoarthritis Outcome Score ( <b>HOOS</b> <sup>16</sup> )                                                                                                                                                                                                                | Baseline, 12, 24 and 36 months |

|                     |                                                                                                                                                                                                                                                                                                                                                                                                                                                                                                                                                                                                                                                                                                    |                                 |
|---------------------|----------------------------------------------------------------------------------------------------------------------------------------------------------------------------------------------------------------------------------------------------------------------------------------------------------------------------------------------------------------------------------------------------------------------------------------------------------------------------------------------------------------------------------------------------------------------------------------------------------------------------------------------------------------------------------------------------|---------------------------------|
|                     | 4. severity of hand pain in those with prevalent symptomatic hand osteoarthritis assessed by the QuickDASH <sup>17</sup>                                                                                                                                                                                                                                                                                                                                                                                                                                                                                                                                                                           | Baseline, 12, 24 and 36 months  |
| Dental              | Secondary:<br>1. Decline in oral health assessed with the Geriatric Oral Health Assessment Index (GOHAI) <sup>18</sup> questionnaire                                                                                                                                                                                                                                                                                                                                                                                                                                                                                                                                                               | Baseline, 12, 24, and 36 months |
|                     | 2. Tooth loss assessed by tooth count at every clinical visit                                                                                                                                                                                                                                                                                                                                                                                                                                                                                                                                                                                                                                      | Over 36 months                  |
| Gastro-Intestinal   | Secondary: rate of GI symptoms assessed with ROME III questionnaire <sup>19,20</sup>                                                                                                                                                                                                                                                                                                                                                                                                                                                                                                                                                                                                               | Baseline, 12, 24, and 36 months |
| Glucose-Metabolic   | Secondary:<br>1. Change in fasting glucose and insulin using calculated using quantitative insulin-sensitivity check index (QUICKI), and the HOMA index <sup>21</sup>                                                                                                                                                                                                                                                                                                                                                                                                                                                                                                                              | Baseline, 12, 24, and 36 months |
|                     | 2. Body composition among a subset of 1503 participants with DXA measurements                                                                                                                                                                                                                                                                                                                                                                                                                                                                                                                                                                                                                      | Baseline, 12, 24, and 36 months |
| Kidney              | Secondary : Decline in kidney function measured by blood creatinine levels and estimated glomerular filtration rate with the Cockcroft-Gault formula <sup>22</sup>                                                                                                                                                                                                                                                                                                                                                                                                                                                                                                                                 | Baseline, 12, 24, and 36 months |
| Global Health       | Secondary:<br>1. Quality of life assessed with EQ5D-3L (EuroQuol) questionnaire <sup>23</sup>                                                                                                                                                                                                                                                                                                                                                                                                                                                                                                                                                                                                      | Every 6 months                  |
|                     | 2. Incident frailty assessed with the Survey of Health, Aging and Retirement in Europe - Frailty Instrument (SHARE-FI) <sup>24</sup>                                                                                                                                                                                                                                                                                                                                                                                                                                                                                                                                                               | Over 36 months                  |
|                     | 3. Incident disability regarding activities of daily living assessed with Health Assessment Questionnaire (PROMIS-HAQ) questionnaire <sup>25</sup>                                                                                                                                                                                                                                                                                                                                                                                                                                                                                                                                                 | Baseline, 12, 24 and 36 months  |
|                     | 4. Incident nursing home admission                                                                                                                                                                                                                                                                                                                                                                                                                                                                                                                                                                                                                                                                 | Over 36 months                  |
|                     | 5. Rate of acute hospital admission                                                                                                                                                                                                                                                                                                                                                                                                                                                                                                                                                                                                                                                                | Over 36 months                  |
|                     | 6. Mortality                                                                                                                                                                                                                                                                                                                                                                                                                                                                                                                                                                                                                                                                                       | Over 36 months                  |
| Biomarker endpoints | <ul style="list-style-type: none"> <li>▪ To support primary and secondary endpoints of the study: <ul style="list-style-type: none"> <li>(1) Bone: calcium, phosphate, 25(OH)D, intact PTH, calcium/creatinine ratio in second spot urine (<i>calculated</i>), Beta-Crosslaps serum, P1NP, albumin</li> <li>(2) Cardiovascular: Troponin T, NT-proBNP, homocysteine, creatin kinase, cholesterol, HDL-cholesterol, nonHDL-cholesterol, LDL-cholesterol, triglycerides</li> <li>(3) Inflammation: high sensitivity CRP, Interleukin 6</li> <li>(4) Gastrointestinal: AST, ALT, gGT, alkaline phosphatase, bilirubin</li> <li>(5) Glucose-metabolic: fasting glucose, insulin</li> </ul> </li> </ul> | Baseline, 12, 24, and 36 months |

|                      |                                                                                                                                                                                                                                                                                                                                                                                                                                                                                                                                                                                                                                                                                                                                                                                                                                                                                                                                                                                                                                            |                                 |
|----------------------|--------------------------------------------------------------------------------------------------------------------------------------------------------------------------------------------------------------------------------------------------------------------------------------------------------------------------------------------------------------------------------------------------------------------------------------------------------------------------------------------------------------------------------------------------------------------------------------------------------------------------------------------------------------------------------------------------------------------------------------------------------------------------------------------------------------------------------------------------------------------------------------------------------------------------------------------------------------------------------------------------------------------------------------------|---------------------------------|
|                      | <p>(6) Kidney: serum creatinine; calcium/creatinine ratio in second spot urine (<i>calculated</i>), serum urea, uric acid, albumin urine, total protein, eGFR (<i>calculated</i>)</p> <p>(7) Global Health:</p> <ul style="list-style-type: none"> <li>– Ions: sodium, potassium, chloride, magnesium;</li> <li>– Proteins: total protein, albumin, ferritin, soluble transferrin receptor;</li> <li>– Hormones: TSH, fT4, fT3, cortisol;</li> <li>– Vitamins: folic acid, vitamin B12, 25(OH)D</li> </ul> <ul style="list-style-type: none"> <li>▪ For novel inflammation and immunity markers (802 participants recruited in Zurich and Basel): <ul style="list-style-type: none"> <li>(1) <i>Inflammation</i>: TNF-<math>\alpha</math>, IL-10, IL-17, IL-22</li> <li>(2) <i>Cellular immunity</i>: CD3, CD4, CD25, CD127</li> </ul> </li> <li>▪ For novel bone and muscle markers (802 participants recruited in Zurich and Basel): <ul style="list-style-type: none"> <li>(1) Sclerostin</li> <li>(2) Myostatin</li> </ul> </li> </ul> |                                 |
| Adherence laboratory | Serum 25(OH)D concentrations (measured both by an automated assay and HPLCMS/MS) and plasma PUFA concentrations (EPA, AA, DHA; measured by a sensitive and selective assay based on gas chromatography coupled to mass spectrometry detection (GC-MS)) in all participants                                                                                                                                                                                                                                                                                                                                                                                                                                                                                                                                                                                                                                                                                                                                                                 | Baseline, 12, 24, and 36 months |

#### References

1. Bischoff-Ferrari HA, Dawson-Hughes B, Stocklin E, et al. Oral supplementation with 25(OH)D3 versus vitamin D3: effects on 25(OH)D levels, lower extremity function, blood pressure, and markers of innate immunity. *J Bone Miner Res*. 2012;27(1):160-169.
2. Guralnik JM, Simonsick EM, Ferrucci L, et al. A short physical performance battery assessing lower extremity function: association with self-reported disability and prediction of mortality and nursing home admission. *Journal of gerontology*. 1994;49(2):M85-94.
3. Desrosiers J, Hebert R, Bravo G, Dutil E. Comparison of the Jamar dynamometer and the Martin vigorimeter for grip strength measurements in a healthy elderly population. *Scand J Rehabil Med*. 1995;27(3):137-143.
4. Escalante A, Lichtenstein MJ, White K, Rios N, Hazuda HP. A method for scoring the pain map of the McGill Pain Questionnaire for use in epidemiologic studies. *Aging (Milano)*. 1995;7(5):358-366.
5. Wolf AM, Hunter DJ, Colditz GA, et al. Reproducibility and validity of a self-administered physical activity questionnaire. *International journal of epidemiology*. 1994;23(5):991-999.
6. Nasreddine ZS, Phillips NA, Bedirian V, et al. The Montreal Cognitive Assessment, MoCA: a brief screening tool for mild cognitive impairment. *Journal of the American Geriatrics Society*. 2005;53(4):695-699.
7. Yesavage JA, Brink TL, Rose TL, et al. Development and validation of a geriatric depression screening scale: a preliminary report. *J Psychiatr Res*. 1982;17(1):37-49.
8. Okimoto JT, Barnes RF, Veith RC, Raskind MA, Inui TS, Carter WB. Screening for depression in geriatric medical patients. *Am J Psychiatry*. 1982;139(6):799-802.
9. Beauchet O, Annweiler C, Lecordroch Y, et al. Walking speed-related changes in stride time variability: effects of decreased speed. *J Neuroeng Rehabil*. 2009;6:32.
10. Bischoff-Ferrari HA, Orav EJ, Egli A, et al. Recovery after unilateral knee replacement due to severe osteoarthritis and progression in the contralateral knee: a randomised clinical trial comparing daily 2000 IU versus 800 IU vitamin D. *RMD open*. 2018;4(2):e000678-e000678.
11. Bischoff-Ferrari HA, Dawson-Hughes B, Orav EJ, et al. Monthly High-Dose Vitamin D Treatment for the Prevention of Functional Decline: A Randomized Clinical Trial. *JAMA Intern Med*. 2016;176(2):175-183.
12. Roos EM, Toksvig-Larsen S. Knee injury and Osteoarthritis Outcome Score (KOOS) - validation and comparison to the WOMAC in total knee replacement. *Health Qual Life Outcomes*. 2003;1(17):17.
13. Felson DT, Niu J, McClennan C, et al. Knee Buckling: Prevalence, Risk Factors, and Associated Limitations in Function. *Annals of Internal Medicine*. 2007;147(8):534-540.
14. Altman R, Alarcon G, Appelrouth D, et al. The American College of Rheumatology criteria for the classification and reporting of osteoarthritis of the hip. *Arthritis Rheum*. 1991;34(5):505-514.

15. Altman R, Asch E, Bloch D, et al. Development of criteria for the classification and reporting of osteoarthritis. Classification of osteoarthritis of the knee. Diagnostic and Therapeutic Criteria Committee of the American Rheumatism Association. *Arthritis Rheum*. 1986;29(8):1039-1049.
16. Nilsson AK, Lohmander LS, Klassbo M, Roos EM. Hip disability and osteoarthritis outcome score (HOOS)--validity and responsiveness in total hip replacement. *BMC Musculoskelet Disord*. 2003;4(10):10.
17. Beaton DE, Katz JN, Fossel AH, Wright JG, Tarasuk V, Bombardier C. Measuring the whole or the parts? Validity, reliability, and responsiveness of the Disabilities of the Arm, Shoulder and Hand outcome measure in different regions of the upper extremity. *J Hand Ther*. 2001;14(2):128-146.
18. Atchison KA, Dolan TA. Development of the Geriatric Oral Health Assessment Index. *J Dent Educ*. 1990;54(11):680-687.
19. Rey E, Locke GR, 3rd, Jung HK, et al. Measurement of abdominal symptoms by validated questionnaire: a 3-month recall timeframe as recommended by Rome III is not superior to a 1-year recall timeframe. *Aliment Pharmacol Ther*. 2010;31(11):1237-1247.
20. Drossman DA. Rome III: the new criteria. *Chin J Dig Dis*. 2006;7(4):181-185.
21. Borai A, Livingstone C, Kaddam I, Ferns G. Selection of the appropriate method for the assessment of insulin resistance. *BMC Med Res Methodol*. 11(1):158.
22. Charleson HA, Bailey RR, Stewart A. Quick prediction of creatinine clearance without the necessity of urine collection. *N Z Med J*. 1980;92(673):425-426.
23. EuroQol--a new facility for the measurement of health-related quality of life. *Health Policy*. 1990;16(3):199-208.
24. Romero-Ortuno R, Walsh CD, Lawlor BA, Kenny RA. A frailty instrument for primary care: findings from the Survey of Health, Ageing and Retirement in Europe (SHARE). *BMC geriatrics*. 2010;10:57.
25. Fries JF, Cella D, Rose M, Krishnan E, Bruce B. Progress in assessing physical function in arthritis: PROMIS short forms and computerized adaptive testing. *J Rheumatol*. 2009;36(9):2061-2066.

**eTable 2. Post Hoc Analysis Using Multiply Imputed Data and Site Random Effects**

**Table 2A. Primary continuous endpoints**

|                                                           | Vitamin D<br>(n=1076)   | Vitamin D<br>No Vitamin D<br>(n=1081) | Difference<br>(99% CI)<br>P value | Omega-3<br>(n=1073)     | Omega-3<br>No Omega-3<br>(n=1084) | Difference<br>(99% CI)<br>P value | Strength<br>Exercise<br>(n=1081) | Exercise<br>Control Exercise <sup>a</sup><br>(n=1076) | Difference<br>(99% CI)<br>P value |
|-----------------------------------------------------------|-------------------------|---------------------------------------|-----------------------------------|-------------------------|-----------------------------------|-----------------------------------|----------------------------------|-------------------------------------------------------|-----------------------------------|
| <b>Systolic BP (99% CI)</b>                               |                         |                                       |                                   |                         |                                   |                                   |                                  |                                                       |                                   |
| Unadjusted baseline                                       | 144.2<br>(142.7, 145.6) | 142.9<br>(141.4, 144.3)               | 1.3 (-0.8, 3.3)<br>P=0.10         | 143.2<br>(141.8, 144.7) | 143.9<br>(142.4, 145.3)           | -0.7 (-2.7, 1.4)<br>P=0.41        | 143.7<br>(142.2, 145.1)          | 143.4<br>(141.9, 144.8)                               | 0.3 (-1.7, 2.4)<br>P=0.69         |
| Adjusted change from baseline <sup>b</sup>                |                         |                                       |                                   |                         |                                   |                                   |                                  |                                                       |                                   |
| Year I                                                    | -7.9 (-10.3, -5.5)      | -7.5 (-9.9, -5.1)                     | -0.4 (-2.1, 1.2)<br>P=0.52        | -7.8 (-10.2, -5.4)      | -7.6 (-10.0, -5.2)                | -0.2 (-1.8, 1.4)<br>P=0.77        | -7.3 (-9.7, -4.8)                | -8.1 (-10.5, -5.7)                                    | 0.9 (-1.0, 2.7)<br>P=0.23         |
| Year II                                                   | -8.5 (-10.9, -6.2)      | -7.5 (-9.9, -5.1)                     | -1.0 (-2.7, 0.6)<br>P=0.11        | -8.6 (-11.0, -6.2)      | -7.5 (-9.9, -5.0)                 | -1.1 (-2.8, 0.6)<br>P=0.09        | -7.8 (-10.3, -5.4)               | -8.2 (-10.6, -5.8)                                    | 0.4 (-1.4, 2.2)<br>P=0.59         |
| Year III                                                  | -8.8 (-11.3, -6.3)      | -7.4 (-9.9, -4.9)                     | -1.4 (-3.3, 0.5)<br>P=0.05        | -8.7 (-11.2, -6.3)      | -7.5 (-10.0, -5.0)                | -1.3 (-3.1, 0.6)<br>P=0.08        | -8.0 (-10.5, -5.5)               | -8.2 (-10.7, -5.8)                                    | 0.3 (-1.6, 2.1)<br>P=0.71         |
| Across all 3 years                                        | -8.4 (-10.7, -6.1)      | -7.5 (-9.8, -5.2)                     | -0.9 (-2.2, 0.4)<br>P=0.08        | -8.3 (-10.6, -6.0)      | -7.5 (-9.9, -5.2)                 | -0.8 (-2.1, 0.5)<br>P=0.12        | -7.7 (-10.0, -5.3)               | -8.2 (-10.5, -5.9)                                    | 0.5 (-0.9, 2.0)<br>P=0.34         |
| <b>Diastolic BP (99% CI)</b>                              |                         |                                       |                                   |                         |                                   |                                   |                                  |                                                       |                                   |
| Unadjusted baseline                                       | 75.7 (74.9, 76.5)       | 76.0 (75.2, 76.8)                     | 0.3 (-0.8, 1.4)<br>P=0.47         | 75.8 (75.0, 76.6)       | 75.9 (75.2, 76.7)                 | -0.1 (-1.2, 1.0)<br>P=0.77        | 75.9 (75.1, 76.7)                | 75.9 (75.1, 76.6)                                     | 0.1 (-1.6, 1.2)<br>P=0.89         |
| Adjusted change from baseline <sup>b</sup>                |                         |                                       |                                   |                         |                                   |                                   |                                  |                                                       |                                   |
| Year I                                                    | -3.0 (-4.7, -1.3)       | -3.1 (-4.9, -1.4)                     | 0.1 (-0.8, 1.0)<br>P=0.71         | -3.3 (-5.0, -1.5)       | -2.9 (-4.6, -1.1)                 | -0.4 (-1.3, 0.5)<br>P=0.25        | -2.7 (-4.5, -1.0)                | -3.4 (-5.2, -1.7)                                     | 0.7 (-0.3, 1.7)<br>P=0.07         |
| Year II                                                   | -3.3 (-5.1, -1.6)       | -3.2 (-4.9, -1.4)                     | -0.2 (-1.1, 0.8)<br>P=0.68        | -3.5 (-5.3, -1.8)       | -3.0 (-4.7, -1.2)                 | -0.6 (-1.6, 0.4)<br>P=0.10        | -3.3 (-5.0, -1.5)                | -3.2 (-5.0, -1.5)                                     | -0.1 (-1.0, 0.9)<br>P=0.85        |
| Year III                                                  | -3.6 (-5.3, -1.8)       | -3.4 (-5.2, -1.6)                     | -0.2 (-1.1, 0.8)<br>P=0.63        | -3.8 (-5.6, -2.1)       | -3.1 (-4.9, -1.4)                 | -0.7 (-1.7, 0.3)<br>P=0.06        | -3.5 (-5.2, -1.7)                | -3.5 (-5.3, -1.8)                                     | 0.1 (-0.9, 1.0)<br>P=0.85         |
| Across all 3 years                                        | -3.3 (-5.0, -1.6)       | -3.2 (-4.9, -1.6)                     | -0.1 (-0.8, 0.7)<br>P=0.87        | -3.5 (-5.2, -1.8)       | -3.0 (-4.7, -1.3)                 | -0.6 (-1.3, 0.2)<br>P=0.05        | -3.1 (-4.8, -1.4)                | -3.4 (-5.1, -1.7)                                     | 0.3 (-0.5, 1.1)<br>P=0.34         |
| <b>Montreal Cognitive Assessment (99% CI)<sup>c</sup></b> |                         |                                       |                                   |                         |                                   |                                   |                                  |                                                       |                                   |
| Unadjusted baseline                                       | 25.8 (25.5, 26.0)       | 25.6 (25.3, 25.8)                     | 0.2 (-0.1, 0.6)<br>P=0.11         | 25.7 (25.4, 25.9)       | 25.7 (25.4, 25.9)                 | -0.0 (-0.4, 0.4)<br>P=0.87        | 25.7 (25.4, 25.9)                | 25.65 (25.4, 25.9)                                    | 0.0 (-0.4, 0.4)<br>P=0.88         |
| Adjusted change from baseline <sup>b</sup>                |                         |                                       |                                   |                         |                                   |                                   |                                  |                                                       |                                   |
| Year I                                                    | 0.2 (-0.6, 1.0)         | 0.4 (-0.4, 1.2)                       | -0.2 (-0.5, 0.1)<br>P=0.05        | 0.3 (-0.5, 1.1)         | 0.4 (-0.4, 1.2)                   | -0.1 (-0.3, 0.2)<br>P=0.49        | 0.3 (-0.5, 1.1)                  | 0.4 (-0.5, 1.2)                                       | -0.0 (-0.3, 0.2)<br>P=0.69        |
| Year II                                                   | 0.4 (-0.4, 1.2)         | 0.5 (-0.3, 1.3)                       | -0.1 (-0.4, 0.2)<br>P=0.33        | 0.4 (-0.4, 1.2)         | 0.5 (-0.3, 1.3)                   | -0.1 (0.4, 0.2)<br>P=0.47         | 0.5 (-0.3, 1.3)                  | 0.4 (-0.4, 1.2)                                       | 0.1 (-0.1, 0.4)<br>P=0.2          |
| Year III                                                  | 0.3 (-0.5, 1.6)         | 0.4 (-0.4, 1.3)                       | -0.0 (-0.3, 0.3)<br>P=0.72        | 0.4 (-0.4, 1.2)         | 0.4 (-0.5, 1.2)                   | 0.0 (-0.3, 0.3)<br>P=0.83         | 0.3 (-0.5, 1.1)                  | 0.4 (-0.4, 1.2)                                       | -0.1 (-0.4, 0.2)<br>P=0.31        |
| Across all 3 years                                        | 0.3 (-0.5, 1.1)         | 0.5 (-0.4, 1.3)                       | -0.1 (-0.4, 0.1)<br>P=0.16        | 0.4 (-0.4, 1.2)         | 0.4 (-0.4, 1.2)                   | -0.1 (-0.3, 0.2)<br>P=0.59        | 0.4 (-0.4, 1.2)                  | 0.4 (-0.4, 1.2)                                       | -0.0 (-0.2, 0.2)<br>P=0.92        |



|                                                                | Vitamin D<br>(n=272) | Placebo<br>(n=270) | Difference<br>(99% CI)<br>P value | Omega-3<br>(n=269) | Placebo<br>(n=270) | Difference<br>(99% CI)<br>P value | Strength<br>Exercise<br>(n=267) | Placebo<br>(n=270) | Difference<br>(99% CI)<br>P value |
|----------------------------------------------------------------|----------------------|--------------------|-----------------------------------|--------------------|--------------------|-----------------------------------|---------------------------------|--------------------|-----------------------------------|
| <b>Short Physical Performance Battery (99% CI)<sup>d</sup></b> |                      |                    |                                   |                    |                    |                                   |                                 |                    |                                   |
| Unadjusted baseline                                            | 10.9 (10.7, 11.2)    | 10.9 (10.7, 11.1)  | 0.0 (-0.3, 0.3)<br>P=0.88         | 10.9 (10.7, 11.2)  | 10.9 (10.7, 11.1)  | 0.0 (-0.3, 0.3)<br>P=0.89         | 10.8 (10.5, 11.0)               | 10.9 (10.7, 11.1)  | -0.1 (-0.5, 0.2)<br>P=0.30        |
| Adjusted change from baseline <sup>b</sup>                     |                      |                    |                                   |                    |                    |                                   |                                 |                    |                                   |
| Year I                                                         | -0.2 (-0.5, 0.1)     | 0.0 (-0.3, 0.3)    | -0.2 (-0.4, 0.1)<br>P=0.06        | -0.1 (-0.4, 0.3)   | 0.0 (-0.3, 0.3)    | -0.1 (-0.3, 0.2)<br>P=0.46        | -0.1 (-0.4, 0.3)                | 0.0 (-0.3, 0.3)    | -0.1 (-0.3, 0.2)<br>P=0.55        |
| Year II                                                        | -0.0 (-0.4, 0.3)     | -0.0 (-0.4, 0.3)   | -0.0 (-0.3, 0.3)<br>P=0.92        | -0.1 (-0.4, 0.2)   | -0.0 (-0.4, 0.3)   | -0.1 (-0.4, 0.2)<br>P=0.44        | -0.0 (-0.4, 0.3)                | -0.0 (-0.4, 0.3)   | 0.0 (-0.3, 0.3)<br>P=0.97         |
| Year III                                                       | -0.1 (-0.57, 0.2)    | -0.1 (-0.4, 0.2)   | -0.0 (-0.3, 0.3)<br>P=0.79        | -0.0 (-0.4, 0.3)   | -0.1 (-0.4, 0.2)   | 0.1 (-0.2, 0.4)<br>P=0.44         | -0.2 (-0.6, 0.1)                | -0.1 (-0.4, 0.2)   | -0.1 (-0.4, 0.2)<br>P=0.26        |
| Across all 3 years                                             | -0.1 (-0.4, 0.2)     | -0.0 (-0.3, 0.3)   | -0.1 (-0.1, 0.3)<br>P=0.31        | -0.1 (-0.4, 0.2)   | -0.0 (-0.3, 0.3)   | -0.0 (-0.2, 0.2)<br>P=0.77        | -0.1 (-0.4, 0.2)                | -0.0 (-0.3, 0.3)   | -0.1 (-0.3, 0.2)<br>P=0.47        |

Abbreviations: BP, blood pressure; CI, confidence interval.

<sup>a</sup> Flexibility is the control exercise program.

<sup>b</sup> Regression models were adjusted for age, sex, prior falls, body mass index, number of visit, and corresponding baseline measure, and the random effect of study site. Models were based on complete, imputed data, and adjusted for correlated residuals across time within participants. Changes by year are changes from baseline to the end of that year. Changes across all 3 years are the mean, main effect, of three annual changes from baseline.

<sup>c</sup> A significant time-by-treatment interaction (P=0.04) was found only for the effect of strength exercise on the Montreal Cognitive Assessment, so that strength exercise effects on the Montreal Cognitive Assessment should be viewed on a year-by-year basis rather than across all 3 years. The Montreal Cognitive Assessment was used to assess cognitive decline. The Montreal Cognitive Assessment is a one-page 30-point test that covers several cognitive domains (visuospatial/executive skills, attention, naming, memory, delayed recall, attention, language, abstraction, orientation to time, and place). Positive changes indicate improvement in cognitive function over time.

<sup>d</sup> Significant treatment interactions were found for the Short Physical Performance Battery. Therefore, treatment indicators were included for each of the 8 combinations of treatments in the regression models and each intervention group (with neither of the other two interventions present) was compared to the 270 participants who received none of the 3 intervention. The Short Physical Performance Battery was used to assess muscle function. The Short Physical Performance Battery is a brief performance-based test that includes walking speed, repeated chair stands, and a balance test. Its three components are scored between 0 to 4, with 4 indicating the highest level of performance, and are summed up to yield an overall score (maximum of 12 points). Negative changes indicate decrease in muscle function over time.

**Table 2B. Primary count endpoints**

|                                            | Vitamin D    |                      | Omega-3      |                      | Exercise          |                               |
|--------------------------------------------|--------------|----------------------|--------------|----------------------|-------------------|-------------------------------|
|                                            | Vitamin D    | No Vitamin D         | Omega-3      | No Omega-3           | Strength Exercise | Control Exercise <sup>a</sup> |
| <b>Nonvertebral fractures <sup>b</sup></b> |              |                      |              |                      |                   |                               |
| N of participants                          | 1076         | 1081                 | 1073         | 1084                 | 1081              | 1076                          |
| N of fractures                             | 129          | 127                  | 136          | 120                  | 133               | 123                           |
| Incidence rate                             | 0.04         | 0.04                 | 0.04         | 0.04                 | 0.04              | 0.04                          |
| (99% CI) per person year                   | (0.03, 0.05) | (0.03, 0.05)         | (0.03, 0.06) | (0.03, 0.05)         | (0.03, 0.05)      | (0.03, 0.05)                  |
| Incidence Rate Ratio                       |              | 1.03                 |              | 1.17                 |                   | 1.07                          |
| (99% CI)                                   |              | (0.75, 1.43)         |              | (0.85, 1.62)         |                   | (0.77, 1.47)                  |
| P value <sup>d</sup>                       |              | 0.79                 |              | 0.20                 |                   | 0.62                          |
|                                            |              |                      |              |                      |                   |                               |
|                                            | Vitamin D    | Placebo <sup>c</sup> | Omega-3      | Placebo <sup>c</sup> | Strength Exercise | Placebo <sup>c</sup>          |
| <b>All infections <sup>e</sup></b>         |              |                      |              |                      |                   |                               |
| N of participants                          | 272          | 270                  | 269          | 270                  | 267               | 270                           |
| N of infections                            | 786          | 825                  | 716          | 825                  | 841               | 825                           |
| Incidence rate                             | 1.00         | 1.05                 | 0.93         | 1.05                 | 1.09              | 1.05                          |
| (99% CI) per person year                   | (0.79, 1.26) | (0.83, 1.32)         | (0.73, 1.18) | (0.83, 1.32)         | (0.87, 1.38)      | (0.83, 1.32)                  |
| Incidence Rate Ratio                       |              | 0.95                 |              | 0.89                 |                   | 1.04                          |
| (99% CI)                                   |              | (0.84, 1.08)         |              | (0.78, 1.01)         |                   | (0.92, 1.19)                  |
| P value <sup>d</sup>                       |              | 0.33                 |              | 0.02                 |                   | 0.38                          |

Abbreviation: CI, confidence interval.

<sup>a</sup> Flexibility is the control exercise program.

<sup>b</sup> Fractures were assessed every 3 months and confirmed by X-ray reports or medical records that describe an X-ray report of the fracture or mention the repair of the fracture.

<sup>c</sup> Estimates are from unadjusted Poisson regression models of nonvertebral fracture and infection counts across 3 years.

<sup>d</sup> Rates and P-values from Poisson regression models of nonvertebral fracture and infection counts across 3 years. Models were adjusted for the fixed effects of age, sex, prior falls, and body mass index, and the random effect of trial site. A significant treatment interaction between vitamin D and omega-3 was found for infections (P=0.01). Therefore, treatment indicators were included for each of the 8 combinations of treatments in the regression models for infections.

<sup>e</sup> Infections were assessed every 3 months. Participants were asked whether any infection with or without fever had occurred. Every case of infection was confirmed by medical records.

**eTable 3. Mortality and Nursing Home Admission in the 3-Year Follow-up of DO-HEALTH by Treatment Group**

|                                  | n    | Total    | Vitamin D |          | p-value | Omega-3  |          | p-value | Exercise          |                  | p-value |
|----------------------------------|------|----------|-----------|----------|---------|----------|----------|---------|-------------------|------------------|---------|
|                                  |      |          | VitD      | No VitD  |         | n-3s     | No n-3s  |         | Strength Exercise | Control Exercise |         |
|                                  |      |          | (n=1076)  | (n=1081) |         | (n=1073) | (n=1084) |         | (n=1081)          | (n=1076)         |         |
| Death, n (%) <sup>a</sup>        | 2157 | 25 (1.2) | 12 (1.1)  | 13 (1.2) | 0.85    | 8 (0.7)  | 17 (1.6) | 0.07    | 11 (1.0)          | 14 (1.3)         | 0.54    |
| Nursing home, n (%) <sup>a</sup> | 2157 | 22 (1.0) | 13 (1.2)  | 9 (0.8)  | 0.39    | 11 (1.0) | 11 (1.0) | 0.98    | 13 (1.2)          | 9 (0.8)          | 0.39    |
| .                                |      |          |           |          |         |          |          |         |                   |                  |         |

**eTable 4. Adherence to the Study Medication and Exercise Programs [n, (%)] in DO-HEALTH by Treatment Group**

**A. Among participants answering the compliance questionnaire at least once during the time period**

| Time   | Took at least 80% of pills |                 |                 |                 | Performed exercise at least two times per week |                  | Performed exercise at least three times per week |                  |
|--------|----------------------------|-----------------|-----------------|-----------------|------------------------------------------------|------------------|--------------------------------------------------|------------------|
|        | Vitamin D                  | No Vitamin D    | n-3s            | No n-3s         | Strength Exercise                              | Control Exercise | Strength Exercise                                | Control Exercise |
| Year 1 | 953/1043 (91.4)            | 934/1050 (89.0) | 927/1033 (89.7) | 960/1060 (90.6) | 804/1053 (76.4)                                | 829/1040 (79.7)  | 697/1053 (66.2)                                  | 746/1040 (71.7)  |
| Year 2 | 844/966 (87.4)             | 828/968 (85.5)  | 822/950 (86.5)  | 850/984 (86.4)  | 670/967 (69.3)                                 | 681/967 (70.4)   | 571/967 (59.1)                                   | 606/967 (62.7)   |
| Year 3 | 800/964 (83.0)             | 760/968 (78.5)  | 772/945 (81.7)  | 788/987 (79.8)  | 593/971 (61.1)                                 | 625/961 (65.0)   | 510/971 (52.5)                                   | 563/961 (58.6)   |

n-3s= omega-3 fatty acids.

**B. Among all participants assuming noncompliance for both nonrespondants and those without follow-up**

| Time   | Took at least 80% of pills |                       |               |                  | Performed exercise at least two times per week |                           | Performed exercise at least three times per week |                           |
|--------|----------------------------|-----------------------|---------------|------------------|------------------------------------------------|---------------------------|--------------------------------------------------|---------------------------|
|        | Vitamin D (n=1076)         | No Vitamin D (n=1081) | n-3s (n=1073) | No n-3s (n=1084) | Strength Exercise (n=1081)                     | Control Exercise (n=1076) | Strength Exercise (n=1081)                       | Control Exercise (n=1076) |
| Year 1 | 953 (88.6)                 | 934 (86.4)            | 927 (86.4)    | 960 (88.6)       | 804 (74.4)                                     | 829 (77.0)                | 697 (64.5)                                       | 746 (69.3)                |
| Year 2 | 844 (78.4)                 | 828 (76.6)            | 822 (76.6)    | 850 (78.4)       | 670 (62.0)                                     | 681 (63.3)                | 571 (52.8)                                       | 606 (56.3)                |
| Year 3 | 800 (74.4)                 | 760 (70.3)            | 772 (72.0)    | 788 (72.7)       | 593 (54.9)                                     | 625 (58.1)                | 510 (47.2)                                       | 563 (52.3)                |

n-3s= omega-3 fatty acids.

**eTable 5. Average Absolute Changes in Serum 25(OH)D, DHA, and EPA Levels in the Main Effects Groups**

|                | Vitamin D<br>(n=1076) | No Vitamin<br>D (n=1081) | n-3s<br>(n=1073) | No n-3s<br>(n=1084) | Strength<br>Exercise<br>(n=1081) | Control<br>Exercise<br>(n=1076) |
|----------------|-----------------------|--------------------------|------------------|---------------------|----------------------------------|---------------------------------|
|                | Mean (SD)             | Mean (SD)                | Mean (SD)        | Mean (SD)           | Mean (SD)                        | Mean (SD)                       |
| 25(OH)D, ng/mL |                       |                          |                  |                     |                                  |                                 |
| BL             | 22.4 (8.4)            | 22.4 (8.5)               | 22.4 (8.4)       | 22.4 (8.4)          | 22.8 (8.6)                       | 22 (8.3)                        |
| T1             | 33.7 (8.9)            | 21.6 (8.7)               | 27 (10.2)        | 28.2 (11)           | 27.9 (10.4)                      | 27.3 (10.8)                     |
| T2             | 35.9 (10.1)           | 22.5 (9.1)               | 28.6 (11.5)      | 29.8 (11.9)         | 29.7 (11.5)                      | 28.7 (11.9)                     |
| T3             | 37.6 (11.3)           | 24.4 (10.2)              | 30.6 (12.3)      | 31.3 (12.9)         | 31.3 (12.1)                      | 30.7 (13.1)                     |
| DHA, µg/mL     |                       |                          |                  |                     |                                  |                                 |
| BL             | 78.1 (37.9)           | 78.1 (35.9)              | 78.9 (37.2)      | 77.3 (36.6)         | 78.2 (36.5)                      | 78 (37.4)                       |
| T1             | 124.5 (58.6)          | 126.4 (59.8)             | 161 (54.8)       | 91.2 (40.2)         | 125.5 (58.5)                     | 125.5 (60)                      |
| T2             | 103.7 (47.3)          | 105.9 (50)               | 135.1 (44.8)     | 75.4 (31.2)         | 104.6 (48.7)                     | 105 (48.7)                      |
| T3             | 105.2 (51.7)          | 105.9 (48.9)             | 135.6 (49.6)     | 76.3 (29.4)         | 105.9 (52)                       | 105.1 (48.6)                    |
| EPA, µg/mL     |                       |                          |                  |                     |                                  |                                 |
| BL             | 30.6 (21.5)           | 31.1 (19.9)              | 30.8 (20)        | 30.9 (21.4)         | 30.6 (20.8)                      | 31.1 (20.6)                     |
| T1             | 51.6 (32.9)           | 54.2 (33.7)              | 71.5 (32.8)      | 35 (22.3)           | 52.8 (33.1)                      | 53 (33.6)                       |
| T2             | 46.7 (29.2)           | 48.8 (30.2)              | 64.1 (30.2)      | 31.9 (18.5)         | 47.4 (29.7)                      | 48.1 (29.7)                     |
| T3             | 48.8 (30.1)           | 49.3 (29.7)              | 64.7 (30.5)      | 33.8 (19.7)         | 49.3 (30.6)                      | 48.7 (29.1)                     |

25(OH)D= 25-hydroxyvitamin D. DHA= docosahexaenoic acid. EPA= eicosapentaenoic acid. n-3s= omega-3 fatty acids..

**eTable 6. Effects of Treatments on Type of Infections in the 3-Year Follow-up of DO-HEALTH by Treatment Group**

**A. Individual effects**

|                                              | Vitamin D         | Placebo          | Omega-3           | Placebo           | Strength Exercise | Placebo           |
|----------------------------------------------|-------------------|------------------|-------------------|-------------------|-------------------|-------------------|
| <b>Infections, any (N=6233)</b>              |                   |                  |                   |                   |                   |                   |
| Incidence rate (95% CI) per person year      | 1.01 (0.92, 1.10) | 1.06 (0.96,1.15) | 0.94 (0.85, 1.03) | 1.06 (0.96, 1.15) | 1.10 (1.01, 1.20) | 1.06 (0.96, 1.15) |
| Incidence Rate Ratio (95% CI)                | 0.95 (0.84, 1.08) |                  | 0.89 (0.78, 1.01) |                   | 1.04 (0.92, 1.18) |                   |
| p-value                                      | 0.33              |                  | 0.02              |                   | 0.38              |                   |
| <b>Gastrointestinal infections (N=401)</b>   |                   |                  |                   |                   |                   |                   |
| Incidence rate (95% CI) per person year      | 0.05 (0.03, 0.08) | 0.04 (0.03,0.07) | 0.06 (0.04, 0.08) | 0.04 (0.03, 0.07) | 0.06 (0.04, 0.09) | 0.04 (0.03, 0.07) |
| Incidence Rate Ratio (95% CI)                | 1.15 (0.66, 1.98) |                  | 1.25 (0.73, 2.14) |                   | 1.36 (0.80, 2.31) |                   |
| p-value                                      | 0.52              |                  | 0.29              |                   | 0.13              |                   |
| <b>Urinary infections (N=620)</b>            |                   |                  |                   |                   |                   |                   |
| Incidence rate (95% CI) per person year      | 0.07 (0.05, 0.09) | 0.11 (0.08,0.14) | 0.04 (0.03, 0.06) | 0.11 (0.08, 0.14) | 0.10 (0.08, 0.13) | 0.11 (0.08, 0.14) |
| Incidence Rate Ratio (95% CI)                | 0.64 (0.42, 0.96) |                  | 0.38 (0.23, 0.62) |                   | 0.95 (0.66, 1.38) |                   |
| p-value                                      | 0.004             |                  | <.0001            |                   | 0.74              |                   |
|                                              | Vitamin D         | No Vitamin D     | Omega-3           | No Omega-3        | Strength Exercise | Control Exercise  |
| <b>Upper respiratory infections (N=2755)</b> |                   |                  |                   |                   |                   |                   |
| Incidence rate (95% CI) per person year      | 0.44 (0.41, 0.47) | 0.44 (0.41,0.48) | 0.42 (0.39, 0.45) | 0.46 (0.43, 0.50) | 0.43 (0.40, 0.46) | 0.45 (0.42, 0.48) |
| Incidence Rate Ratio (95% CI)                | 0.99 (0.90, 1.09) |                  | 0.90 (0.81, 0.99) |                   | 0.96 (0.87, 1.06) |                   |
| p-value                                      | 0.79              |                  | 0.005             |                   | 0.34              |                   |
| <b>Lower respiratory infections (N=1077)</b> |                   |                  |                   |                   |                   |                   |
| Incidence rate (95% CI) per person year      | 0.15 (0.14, 0.17) | 0.17 (0.15,0.19) | 0.16 (0.15, 0.18) | 0.16 (0.14, 0.18) | 0.17 (0.15, 0.19) | 0.15 (0.14, 0.17) |
| Incidence Rate Ratio (95% CI)                | 0.91 (0.78, 1.07) |                  | 1.05 (0.89, 1.23) |                   | 1.08 (0.93, 1.27) |                   |
| p-value                                      | 0.14              |                  | 0.45              |                   | 0.19              |                   |

## B. Combined effects

|                                                      |                               | Vitamin D +<br>Omega-3 | Vitamin D + Strength<br>Exercise | Omega-3 + Strength<br>Exercise | Omega-3 + Vitamin D +<br>Strength Exercise |
|------------------------------------------------------|-------------------------------|------------------------|----------------------------------|--------------------------------|--------------------------------------------|
| <b>Infections, all<br/>(N=6233)</b>                  | Incidence Rate Ratio (95% CI) | 0.98 (0.86, 1.11)      | 0.95 (0.84, 1.08)                | 0.90 (0.79, 1.03)              | 0.92 (0.81, 1.05)                          |
|                                                      | p-value                       | 0.67                   | 0.34                             | 0.04                           | 0.10                                       |
| <b>Upper respiratory<br/>infections<br/>(N=2755)</b> | Incidence Rate Ratio (95% CI) | 0.89 (0.77,1.02)       | 0.95 (0.83, 1.10)                | 0.87 (0.75, 0.99)              | 0.86 (0.72, 1.02)                          |
|                                                      | p-value                       | 0.03                   | 0.38                             | 0.007                          | 0.02                                       |
| <b>Lower respiratory<br/>infections<br/>(N=1077)</b> | Incidence Rate Ratio (95% CI) | 0.96 (0.76, 1.12)      | 0.99 (0.79, 1.23)                | 1.13 (0.91, 1.42)              | 1.04 (0.79, 1.36)                          |
|                                                      | p-value                       | 0.61                   | 0.90                             | 0.14                           | 0.74                                       |
| <b>Gastrointestinal<br/>infections (N=401)</b>       | Incidence Rate Ratio (95% CI) | 1.04 (0.72, 1.50)      | 1.22 (0.85, 1.75)                | 1.08 (0.75, 1.55)              | 1.17 (0.75, 1.82)                          |
|                                                      | p-value                       | 0.80                   | 0.16                             | 0.59                           | 0.37                                       |
| <b>Urinary infections<br/>(N=620)</b>                | Incidence Rate Ratio (95% CI) | 0.75 (0.56, 1.01)      | 1.01 (0.76, 1.36)                | 0.92 (0.69, 1.23)              | 0.84 (0.58, 1.20)                          |
|                                                      | p-value                       | 0.01                   | 0.90                             | 0.46                           | 0.20                                       |

Incidence rates, incidence rate ratios, and P-values from Poisson regression models of all infections, as well as the most commonly occurring infection types (upper respiratory, lower respiratory, gastrointestinal, urinary), across 3 years. Models were adjusted for the fixed effects of age, sex, prior falls, body mass index, and study site.

**eTable 7. P-Values for Interactions**

|                              | Interaction terms p-values |                      |                                | All groups <sup>b</sup> |
|------------------------------|----------------------------|----------------------|--------------------------------|-------------------------|
|                              | Vitamin D <sup>a</sup>     | Omega-3 <sup>a</sup> | Strength Exercise <sup>a</sup> |                         |
| Systolic                     |                            |                      |                                |                         |
| Age (<75 vs ≥75 years)       | 0.64                       | 0.08                 | 0.995                          |                         |
| Sex                          | 0.01                       | 0.73                 | 0.001                          |                         |
| Vitamin D (<20 vs ≥20 ng/mL) | 0.23                       | 0.23                 | 0.13                           |                         |
| DHA+EPA (<100 vs ≥100 µg/mL) | 0.79                       | 0.87                 | 0.90                           |                         |
| Infections                   |                            |                      |                                |                         |
| Age (<75 vs ≥75 years)       |                            |                      |                                | 0.004                   |
| Sex                          |                            |                      |                                | 0.17                    |
| Vitamin D (<20 vs ≥20 ng/mL) |                            |                      |                                | 0.19                    |
| DHA+EPA (<100 vs ≥100 µg/mL) |                            |                      |                                | 0.002                   |

DHA=docosahexaenoic acid. EPA=eicosapentaenoic acid.

<sup>a</sup> Interaction between the 3 main treatment groups and listed subgroups.

<sup>b</sup> Interaction between the 8 treatment group combinations and listed subgroups.



**eTable 8. Mean Calcium, Parathyroid Hormone (PTH), and Estimated Glomerular Filtration Rate (eGFR) Levels in the 3 Year Follow-up of DO-HEALTH by Treatment Group**

**A. Calcium Levels, mmol/l**

|          |                       | <b>Vitamin D<br/>(n=1076)</b> | <b>No<br/>Vitamin D<br/>(n=1081)</b> | <b>Omega-3<br/>(n=1073)</b> | <b>No<br/>Omega-3<br/>(n=1084)</b> | <b>Strength<br/>Exercise<br/>(n=1081)</b> | <b>Control<br/>Exercise<br/>(n=1076)</b> |
|----------|-----------------------|-------------------------------|--------------------------------------|-----------------------------|------------------------------------|-------------------------------------------|------------------------------------------|
| Baseline | Mean (SD)             | 2.37<br>(0.09)                | 2.37<br>(0.09)                       | 2.37<br>(0.09)              | 2.37<br>(0.09)                     | 2.37<br>(0.09)                            | 2.38<br>(0.09)                           |
|          | ≥2.6 mmol/L,<br>n (%) | 14/1069<br>(1.3)              | 12/1072<br>(1.1)                     | 15/1064<br>(1.4)            | 11/1077<br>(1.0)                   | 14/1072<br>(1.3)                          | 12/1069<br>(1.1)                         |
| Year 1   | Mean (SD)             | 2.33<br>(0.09)                | 2.32<br>(0.09)                       | 2.32<br>(0.09)              | 2.32<br>(0.09)                     | 2.32<br>(0.09)                            | 2.33<br>(0.09)                           |
|          | ≥2.6 mmol/L,<br>n (%) | 2/953<br>(0.2)                | 3/965<br>(0.3)                       | 3/942<br>(0.3)              | 2/976<br>(0.2)                     | 2/956<br>(0.2)                            | 3/962<br>(0.3)                           |
| Year 2   | Mean (SD)             | 2.33<br>(0.08)                | 2.32<br>(0.08)                       | 2.33<br>(0.09)              | 2.32<br>(0.08)                     | 2.32<br>(0.08)                            | 2.33<br>(0.09)                           |
|          | ≥2.6 mmol/L,<br>n (%) | 5/915<br>(0.6)                | 4/916<br>(0.4)                       | 5/901<br>(0.6)              | 4/930<br>(0.4)                     | 4/923<br>(0.4)                            | 5/908<br>(0.6)                           |
| Year 3   | Mean (SD)             | 2.34<br>(0.09)                | 2.33<br>(0.09)                       | 2.33<br>(0.09)              | 2.33<br>(0.09)                     | 2.33<br>(0.09)                            | 2.33<br>(0.09)                           |
|          | ≥2.6 mmol/L,<br>n (%) | 3/914<br>(0.3)                | 9/915<br>(1.0)                       | 7/900<br>(0.8)              | 5/929<br>(0.5)                     | 5/916<br>(0.6)                            | 7/913<br>(0.8)                           |

\*none of the participants had a calcium level above 3.0 mmol/L at any point during the study

**B. PTH Levels, ng/l**

|          |              | <b>Vitamin D<br/>(n=1076)</b> | <b>No Vitamin<br/>D (n=1081)</b> | <b>Omega-3<br/>(n=1073)</b> | <b>No<br/>Omega-3<br/>(n=1084)</b> | <b>Strength<br/>Exercise<br/>(n=1081)</b> | <b>Control<br/>Exercise<br/>(n=1076)</b> |
|----------|--------------|-------------------------------|----------------------------------|-----------------------------|------------------------------------|-------------------------------------------|------------------------------------------|
| Baseline | Mean<br>(SD) | 46.9 (16.3)                   | 47.0 (17.6)                      | 47.3 (16.5)                 | 46.6 (17.4)                        | 47.4 (17.8)                               | 46.5 (16.1)                              |
| Year 1   | Mean<br>(SD) | 47.3 (16.0)                   | 52.1 (18.5)                      | 50.8 (18.5)                 | 48.6 (16.3)                        | 49.8 (17.3)                               | 49.6 (17.6)                              |
| Year 2   | Mean<br>(SD) | 47.7 (16.3)                   | 52.9 (19.9)                      | 51.1 (18.9)                 | 49.5 (17.8)                        | 50.2 (18.5)                               | 50.3 (18.3)                              |
| Year 3   | Mean<br>(SD) | 46.5 (15.9)                   | 51.9 (22.0)                      | 49.7 (19.5)                 | 48.6 (19.3)                        | 49.0 (19.0)                               | 49.3 (19.8)                              |

**C. eGFR, mL/min/1.73m<sup>2</sup>**

|          |              | <b>Vitamin D<br/>(n=1076)</b> | <b>No Vitamin<br/>D (n=1081)</b> | <b>Omega-3<br/>(n=1073)</b> | <b>No Omega-<br/>3 (n=1084)</b> | <b>Strength<br/>Exercise<br/>(n=1081)</b> | <b>Control<br/>Exercise<br/>(n=1076)</b> |
|----------|--------------|-------------------------------|----------------------------------|-----------------------------|---------------------------------|-------------------------------------------|------------------------------------------|
| Baseline | Mean<br>(SD) | 62.9 (10.3)                   | 62.8 (10.4)                      | 63.0 (10.4)                 | 62.6 (10.2)                     | 62.9 (10.4)                               | 62.7 (10.3)                              |
| Year 1   | Mean<br>(SD) | 62.7 (10.7)                   | 63.4 (10.8)                      | 63.2 (10.9)                 | 62.8 (10.6)                     | 63.3 (10.7)                               | 62.8 (10.8)                              |
| Year 2   | Mean<br>(SD) | 62.4 (10.2)                   | 62.7 (10.6)                      | 62.8 (10.6)                 | 62.3 (10.2)                     | 62.7 (10.6)                               | 62.4 (10.2)                              |
| Year 3   | Mean<br>(SD) | 62.0 (10.6)                   | 62.6 (10.7)                      | 62.6 (11.0)                 | 62.0 (10.4)                     | 62.5 (10.7)                               | 62.1 (10.7)                              |

**eTable 9. Adverse Events in the DO-HEALTH by Treatment Group**

**A. Vitamin D Adverse Events**

| Adverse Event (ICD-10, version 2010 when trial was ongoing). | Total (n=2157) | Vitamin D (n=1076) | No Vitamin D (n=1081) | HR (95% CI)      |
|--------------------------------------------------------------|----------------|--------------------|-----------------------|------------------|
| Disorders of mineral metabolism (E83.X)                      | 28 (1.3%)      | 15 (1.4%)          | 13 (1.2%)             |                  |
| Kidney stones (N20.X)                                        | 15 (0.7%)      | 7 (0.7%)           | 8 (0.7%)              |                  |
| Total                                                        | 43             | 17                 | 26                    | 0.71 (0.38-1.31) |

HR= hazard ratio.

**B. Omega-3 Adverse Events**

| Adverse Event (ICD-10, version 2010 when trial was ongoing).                                                                                                                                                                                                   | Total (n=2157) | Omega-3 (n=1073) | No Omega-3 (n=1084) | HR (95% CI)      |
|----------------------------------------------------------------------------------------------------------------------------------------------------------------------------------------------------------------------------------------------------------------|----------------|------------------|---------------------|------------------|
| Gastrointestinal symptoms, i.e. dyspepsia, gastritis and duodenitis, gastro-esophageal reflux disease, abdominal and pelvic pain, symptoms of peptic ulcer, nausea, constipation, diarrhea (K30, K29.X, K21.X, R10.X, K25.X, K27.X, R11. K59.X, K58.X, K52.X). | 458 (21.2%)    | 207 (19.3%)      | 251 (23.5%)         |                  |
| Bleeding, i.e. haematemesis, hematuria, superficial injuries involving multiple body regions, haemorrhage from respiratory passages (K92.X, N02.X, R31, T14.X, T00.X, R04.X)                                                                                   | 181 (8.4%)     | 80 (7.5%)        | 101 (9.3%)          |                  |
| Atrial fibrillation or other irregular rhythms (I48, I49.X)                                                                                                                                                                                                    | 145 (6.7%)     | 78 (7.3)         | 67 (6.2%)           |                  |
| Total*                                                                                                                                                                                                                                                         | 683            | 322              | 361                 | 0.90 (0.77-1.05) |

\*Some participants had more than one type of adverse event.

HR= hazard ratio. ICD-10= International Statistical Classification of Diseases and Related Health Problems, 10th revision coding.

**C. Exercise Adverse Events**

| Adverse Event (ICD-10, version 2010 when trial was ongoing). | Total (n=2157) | Strength Exercise (n=1081) | Control Exercise (n=1076) | HR (95% CI)      |
|--------------------------------------------------------------|----------------|----------------------------|---------------------------|------------------|
| Increased muscle pain (M79.X)                                | 284 (13.2%)    | 125 (11.6%)                | 159 (14.8%)               |                  |
| Increased joint pain (M25.X)                                 | 442 (20.5%)    | 217 (20.1%)                | 225 (20.9%)               |                  |
| Dizziness (R42)                                              | 156 (7.2%)     | 79 (7.3%)                  | 77 (7.2%)                 |                  |
| Tendon lesions (M66.X)                                       | 9 (0.4%)       | 2 (0.2%)                   | 7 (0.7%)                  |                  |
| Total*                                                       | 745            | 361                        | 384                       | 0.97 (0.84-1.13) |

\*Some participants had more than one type of adverse event.

HR= hazard ratio. ICD-10= International Statistical Classification of Diseases and Related Health Problems, 10th revision coding.

#### D. Safety measurements during follow-up

|                                                    | Cases of Adverse Events, n (%) |                             |                      | Cases of Adverse Events, n (%) |                            |                       |
|----------------------------------------------------|--------------------------------|-----------------------------|----------------------|--------------------------------|----------------------------|-----------------------|
|                                                    | Vitamin D<br>(n=1076)          | No Vitamin<br>D<br>(n=1081) | HR (95% CI)          | Omega-3<br>(n=1073)            | No Omega-<br>3<br>(n=1084) | HR (95% CI)           |
| Hypercalcemia,<br>CA $\geq$ 2.6 mmol/L,            | 8                              | 11                          | 0.77 (0.31-<br>1.92) | 11                             | 8                          | 1.47 (0.59-<br>3.67)  |
| PTH $\geq$ 65 ng/l                                 | 204                            | 284                         | 0.71 (0.59-<br>0.84) | 257                            | 231                        | 1.23 (1.03-<br>1.48)  |
| PTH $\leq$ 15 ng/l                                 | 2                              | 3                           | 0.72 (0.12-<br>4.37) | 3                              | 2                          | 1.98 (0.31-<br>12.59) |
| eGFR $\leq$ 30<br>mL/min per<br>1.73m <sup>2</sup> | 4                              | 3                           | 1.37 (0.30-<br>6.32) | 2                              | 3                          | 0.40 (0.07-<br>2.18)  |

eGFR= estimated glomerular filtration rate. HR= hazard ratio. PTH= parathyroid hormone.

**eFigure 1. Serum Changes in 25(OH)D, DHA and EPA by the 8 Treatment Arms**

**A. 25(OH)D, ng/mL**

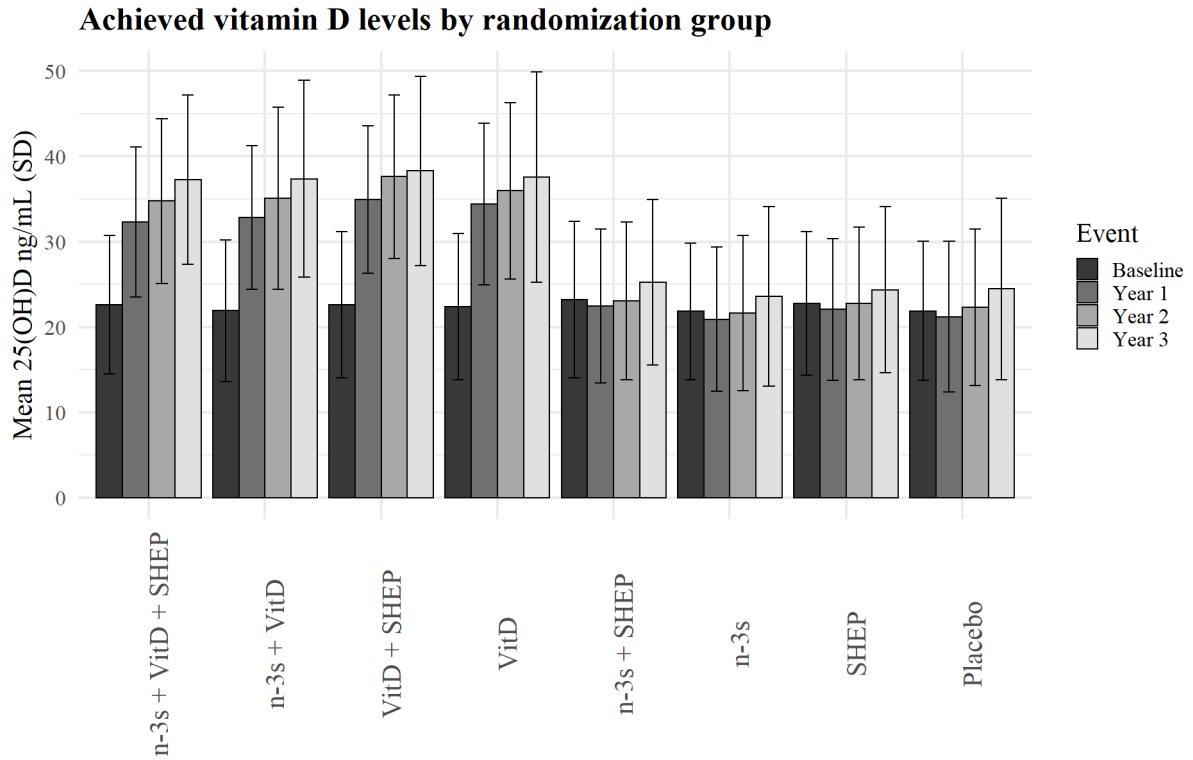

25(OH)D= 25-hydroxyvitamin D. n-3s= omega-3 fatty acids. SHEP= strength-training exercise program. VitD= vitamin D.

**B. DHA,  $\mu\text{g}/\text{mL}$**

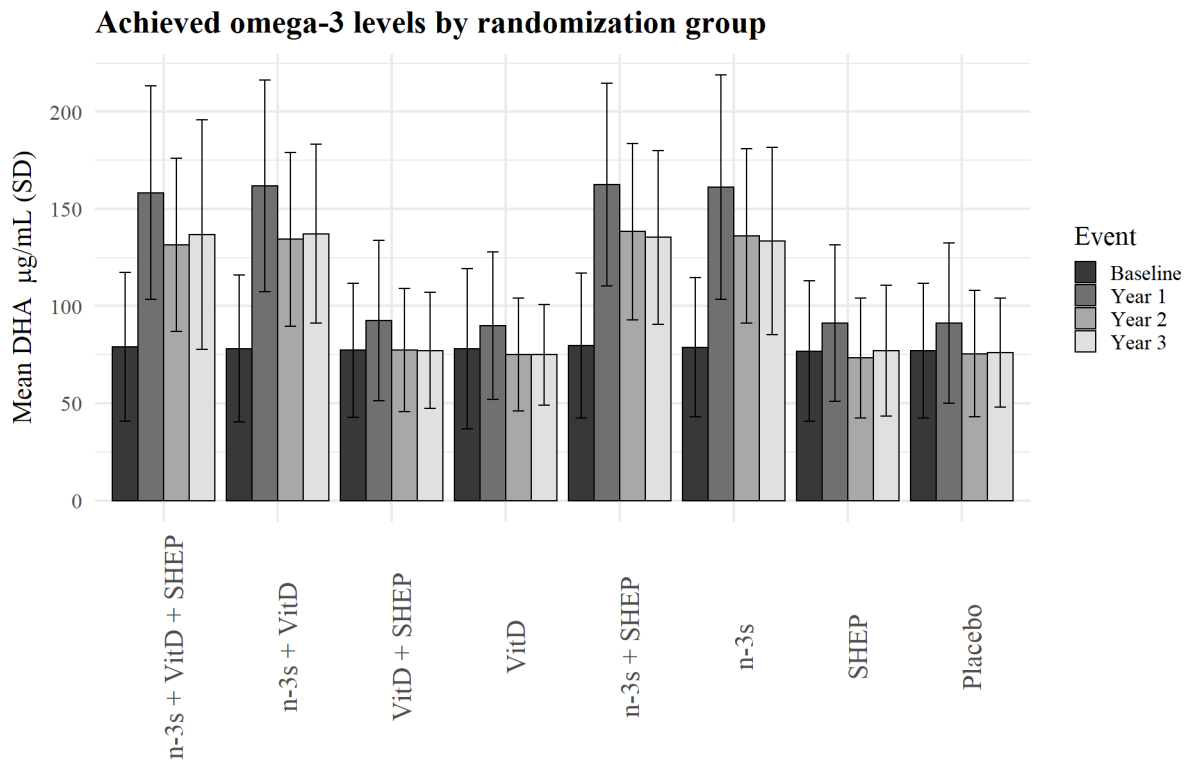

DHA= docosahexaenoic acid. n-3s= omega-3 fatty acids. SHEP= strength-training exercise program. VitD= vitamin D.

C. EPA,  $\mu\text{g/mL}$

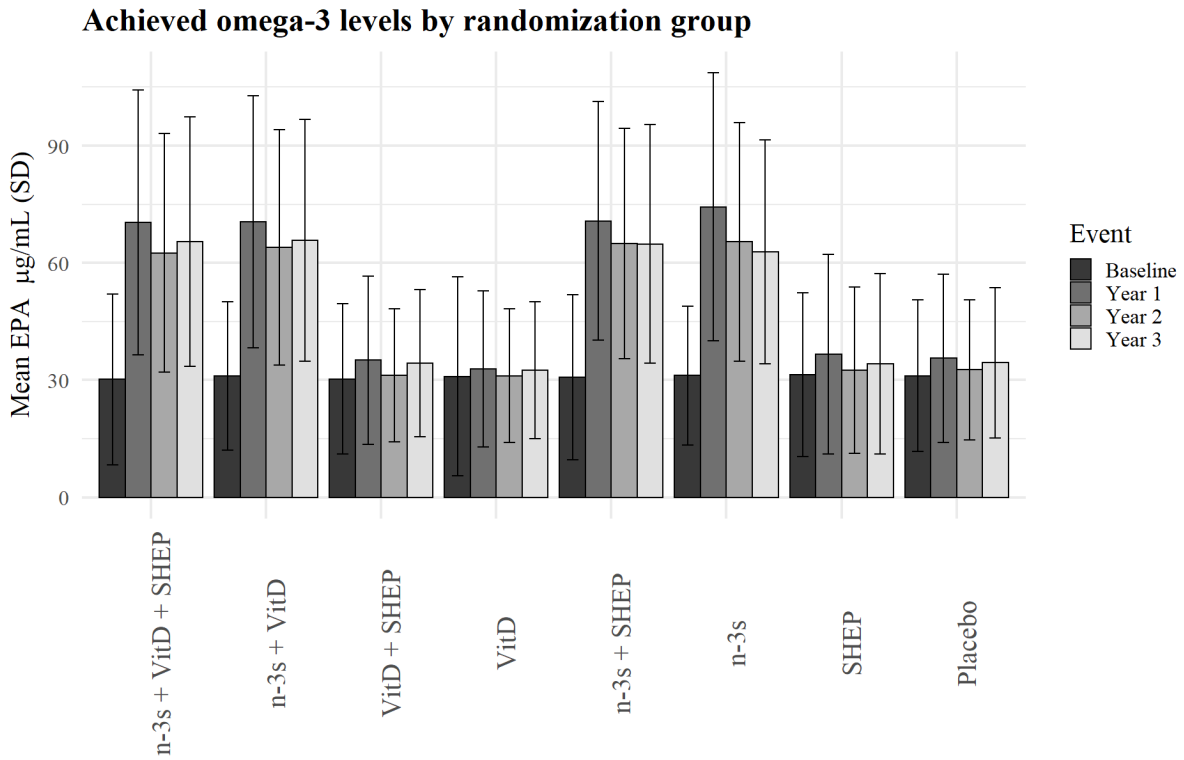

EPA= eicosapentaenoic acid. n-3s= omega-3 fatty acids. SHEP= strength-training exercise program. VitD= vitamin D.

**eFigure 2A.** Subgroup Analysis of Effect of Treatment on Systolic Blood Pressure and Infections by Sex and Age (see next page)

The two primary outcomes with the greatest intervention effects, systolic blood pressure and infections, were examined for subgroup effects.

Abbreviations: CI, confidence interval; IR, incidence rate; IRR, incidence rate ratio.

<sup>a</sup>Number of participants randomized to each treatment group.

<sup>b</sup>Unadjusted values.

<sup>c</sup>Adjusted values. For change in systolic blood pressure, differences are from repeated measures linear regression models in the primary analysis with correlated residuals across time within participants, and adjusted for the fixed effects of age, sex, prior fall, body mass index, number of visit, study site, and baseline systolic blood pressure. The plot shows differences of least square means from repeated measures linear regression model with changes from baseline at 1, 2, and 3 years as outcomes compared to changes in the non-treated group (e.g. vitamin D versus no vitamin D). For infections, results are from the 8 combinations of treatments groups in the primary analysis. The plot shows the incidence rate ratio per person-year from a Poisson regression model with infection count across 3 years as the outcome adjusted for the fixed effects of age, sex, prior fall, body mass index, study site, and offset of log person-years. Error bars show 99% confidence intervals.

<sup>d</sup>Infections were assessed via questionnaire every 3 months and verified by an independent physician using all available information, including symptoms present, treatment received, and general practitioner diagnosis and hospitalization record, if available.

eFIGURE 2A.A: Subgroup analysis of systolic blood pressure by sex and age group

| Group             | N <sup>a</sup> | Mean at BL (99% CI) <sup>b</sup> |                      | Mean at T3 (99% CI) <sup>b</sup> |                      | Absolute difference, T3-BL (99% CI) <sup>b</sup> |                     | Adjusted difference (99% CI) <sup>c</sup> |                         |
|-------------------|----------------|----------------------------------|----------------------|----------------------------------|----------------------|--------------------------------------------------|---------------------|-------------------------------------------|-------------------------|
|                   |                | Treated   Non-treated            | Treated              | Non-treated                      | Treated              | Non-treated                                      | Treated             | Non-treated                               | Treated vs. Non-Treated |
| Vitamin D         |                |                                  |                      |                                  |                      |                                                  |                     |                                           |                         |
| All               | 1076   1081    | 144.2 (142.7, 145.6)             | 142.9 (141.5, 144.3) | 134.9 (133.3, 136.4)             | 135.5 (134.0, 137.1) | -9.5 (-11.0, -8.0)                               | -7.6 (-9.2, -6.0)   | -0.8 (-2.1, 0.5)                          |                         |
| Women             | 667   664      | 143.0 (141.1, 145.0)             | 142.1 (140.2, 144.0) | 133.7 (131.7, 135.7)             | 134.1 (132.1, 136.0) | -9.7 (-11.7, -7.7)                               | -8.5 (-10.5, -6.4)  | 0.2 (-1.5, 2.0)                           |                         |
| Men               | 409   417      | 146.0 (143.9, 148.1)             | 144.2 (142.1, 146.3) | 136.7 (134.3, 139.1)             | 137.9 (135.4, 140.3) | -9.2 (-11.6, -6.9)                               | -6.2 (-8.6, -3.8)   | -2.5 (-4.5, -0.4)                         |                         |
| Age 70-74         | 606   631      | 144.4 (142.4, 146.4)             | 142.2 (140.4, 144.1) | 134.2 (132.2, 136.2)             | 134.6 (132.7, 136.5) | -10.3 (-12.3, -8.3)                              | -7.5 (-9.4, -5.5)   | -0.5 (-2.2, 1.1)                          |                         |
| Age 75+           | 470   450      | 143.9 (141.7, 146.0)             | 143.9 (141.7, 146.1) | 135.8 (133.4, 138.2)             | 136.9 (134.4, 139.5) | -8.5 (-10.8, -6.2)                               | -7.8 (-10.4, -5.3)  | -0.9 (-3.1, 1.2)                          |                         |
| Omega-3           |                |                                  |                      |                                  |                      |                                                  |                     |                                           |                         |
| All               | 1073   1084    | 143.2 (141.8, 144.6)             | 143.9 (142.4, 145.3) | 134.3 (132.8, 135.8)             | 136.1 (134.6, 137.6) | -9.0 (-10.6, -7.4)                               | -8.1 (-9.6, -6.6)   | -0.8 (-2.1, 0.5)                          |                         |
| Women             | 668   663      | 142.3 (140.4, 144.3)             | 142.8 (140.9, 144.7) | 132.6 (130.6, 134.5)             | 135.2 (133.2, 137.1) | -9.8 (-11.9, -7.7)                               | -8.4 (-10.3, -6.5)  | -1.0 (-2.7, 0.7)                          |                         |
| Men               | 405   421      | 144.6 (142.6, 146.7)             | 145.5 (143.3, 147.7) | 137.0 (134.6, 139.3)             | 137.6 (135.1, 140.1) | -7.8 (-10.4, -5.3)                               | -7.6 (-9.9, -5.4)   | -0.7 (-2.7, 1.4)                          |                         |
| Age 70-74         | 635   602      | 142.7 (140.9, 144.6)             | 143.8 (141.8, 145.8) | 133.4 (131.5, 135.3)             | 135.5 (133.5, 137.5) | -9.1 (-11.2, -7.0)                               | -8.5 (-10.5, -6.6)  | -1.5 (-3.2, 0.1)                          |                         |
| Age 75+           | 438   482      | 143.9 (141.6, 146.1)             | 143.9 (141.8, 145.8) | 135.6 (133.1, 138.2)             | 136.9 (134.5, 139.4) | -8.8 (-11.4, -6.3)                               | -7.6 (-9.9, -5.2)   | 0.3 (-1.9, 2.5)                           |                         |
| Strength Exercise |                |                                  |                      |                                  |                      |                                                  |                     |                                           |                         |
| All               | 1081   1076    | 143.7 (142.2, 145.2)             | 143.4 (141.9, 144.8) | 135.5 (134.0, 137.1)             | 134.9 (133.4, 136.4) | -8.6 (-10.2, -7.1)                               | -8.5 (-10.0, -7.0)  | 0.5 (-0.8, 1.9)                           |                         |
| Women             | 665   666      | 142.5 (140.6, 144.5)             | 142.6 (140.7, 144.6) | 134.9 (132.9, 136.9)             | 132.9 (131.0, 134.8) | -8.1 (-10.1, -6.1)                               | -10.0 (-12.1, -8.0) | 1.9 (0.1, 3.6)                            |                         |
| Men               | 416   410      | 145.6 (143.4, 147.8)             | 144.6 (142.5, 146.7) | 136.5 (134.1, 138.9)             | 138.0 (135.6, 140.5) | -9.4 (-11.8, -6.9)                               | -6.1 (-8.4, -3.8)   | -1.6 (-3.6, 0.5)                          |                         |
| Age 70-74         | 622   615      | 143.6 (141.6, 145.5)             | 143.0 (141.0, 144.9) | 134.7 (132.8, 136.6)             | 134.1 (132.1, 136.1) | -8.9 (-10.8, -6.9)                               | -8.8 (-10.9, -6.7)  | 0.5 (-1.2, 2.2)                           |                         |
| Age 75+           | 459   461      | 143.8 (141.6, 146.1)             | 143.9 (141.8, 146.0) | 136.7 (134.1, 139.3)             | 136.0 (133.6, 138.3) | -8.3 (-10.8, -5.7)                               | -8.0 (-10.3, -5.8)  | 0.5 (-1.6, 2.7)                           |                         |

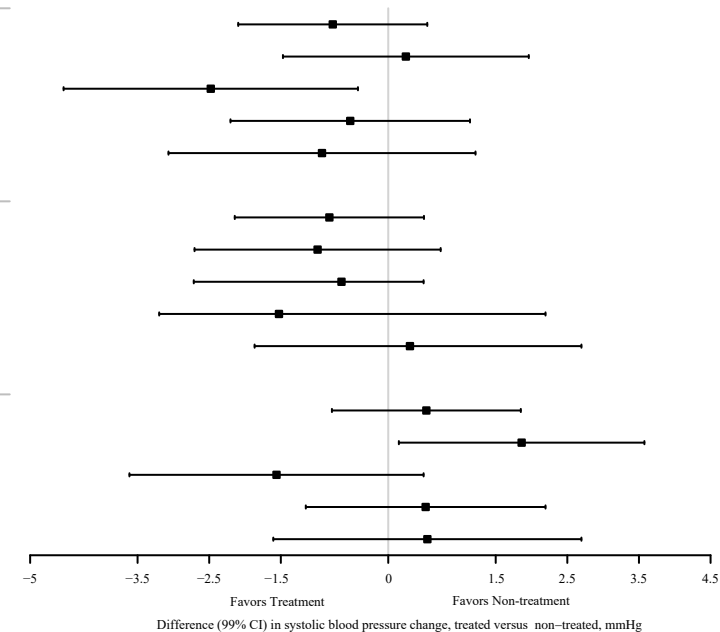

eFIGURE 2A.B: Subgroup analysis of infections by sex and age group

| Group                  | N <sup>a</sup> | Number of infections <sup>d</sup> | Crude IR (99% CI) <sup>b</sup> |                   | Adjusted IRR (99% CI) <sup>c</sup> |                    |
|------------------------|----------------|-----------------------------------|--------------------------------|-------------------|------------------------------------|--------------------|
|                        |                |                                   | Treated   Placebo              | Treated           | Placebo                            | Treated vs Placebo |
| Vitamin D only         |                |                                   |                                |                   |                                    |                    |
| All                    | 272   270      | 786                               | 825                            | 1.04 (0.95, 1.14) | 1.10 (1.00, 1.20)                  | 0.95 (0.84, 1.08)  |
| Women                  | 170   165      | 536                               | 560                            | 1.12 (1.00, 1.25) | 1.21 (1.08, 1.34)                  | 0.94 (0.80, 1.10)  |
| Men                    | 102   105      | 250                               | 265                            | 0.90 (0.76, 1.06) | 0.92 (0.78, 1.08)                  | 0.97 (0.77, 1.22)  |
| Age 70-74              | 139   155      | 407                               | 542                            | 1.06 (0.93, 1.21) | 1.23 (1.10, 1.38)                  | 0.84 (0.71, 0.99)  |
| Age 75+                | 133   115      | 379                               | 283                            | 1.02 (0.89, 1.16) | 0.91 (0.78, 1.06)                  | 1.15 (0.94, 1.41)  |
| Omega-3 only           |                |                                   |                                |                   |                                    |                    |
| All                    | 269   270      | 716                               | 825                            | 0.97 (0.88, 1.06) | 1.10 (1.00, 1.20)                  | 0.89 (0.78, 1.01)  |
| Women                  | 166   165      | 508                               | 560                            | 1.11 (0.99, 1.25) | 1.21 (1.08, 1.34)                  | 0.93 (0.79, 1.09)  |
| Men                    | 103   105      | 208                               | 265                            | 0.73 (0.61, 0.87) | 0.92 (0.78, 1.08)                  | 0.78 (0.61, 0.99)  |
| Age 70-74              | 165   155      | 478                               | 542                            | 1.05 (0.94, 1.19) | 1.23 (1.10, 1.38)                  | 0.87 (0.74, 1.02)  |
| Age 75+                | 104   115      | 238                               | 283                            | 0.83 (0.70, 0.98) | 0.91 (0.78, 1.06)                  | 0.94 (0.75, 1.18)  |
| Strength Exercise only |                |                                   |                                |                   |                                    |                    |
| All                    | 267   270      | 841                               | 825                            | 1.14 (1.04, 1.24) | 1.10 (1.00, 1.20)                  | 1.04 (0.92, 1.18)  |
| Women                  | 161   165      | 544                               | 560                            | 1.22 (1.09, 1.36) | 1.21 (1.08, 1.34)                  | 1.02 (0.87, 1.19)  |
| Men                    | 106   105      | 297                               | 265                            | 1.02 (0.88, 1.18) | 0.92 (0.78, 1.08)                  | 1.09 (0.88, 1.36)  |
| Age 70-74              | 152   155      | 502                               | 542                            | 1.18 (1.05, 1.32) | 1.23 (1.10, 1.38)                  | 0.93 (0.79, 1.09)  |
| Age 75+                | 115   115      | 339                               | 283                            | 1.08 (0.94, 1.24) | 0.91 (0.78, 1.06)                  | 1.27 (1.03, 1.56)  |

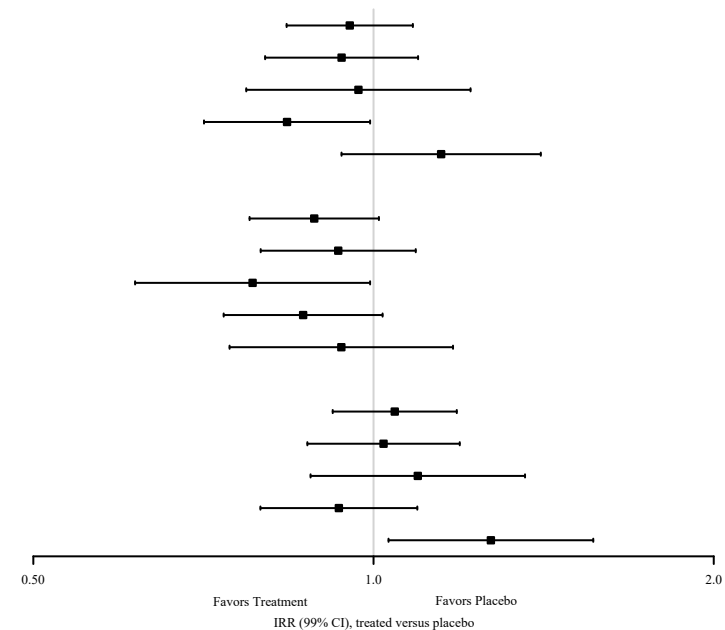



**eFigure 2B.** Subgroup Analysis of Effect of Treatment on Systolic Blood Pressure and Infections by Baseline Levels of 25(OH)D and Median Levels of DHA and EPA (see next page)

The two primary outcomes with the greatest intervention effects, systolic blood pressure and infections, were examined for subgroup effects.

Abbreviations: CI, confidence interval; IR, incidence rate; IRR, incidence rate ratio.

<sup>a</sup>Number of participants randomized to each treatment group.

<sup>b</sup>Unadjusted values.

<sup>c</sup>Adjusted values. For change in systolic blood pressure, differences are from repeated measures linear regression models in the primary analysis with correlated residuals across time within participants, and adjusted for the fixed effects of age, sex, prior fall, body mass index, number of visit, study site, and baseline systolic blood pressure. The plot shows differences of least square means from repeated measures linear regression model with changes from baseline at 1, 2, and 3 years as outcomes compared to changes in the non-treated group (e.g. vitamin D versus no vitamin D). For infections, results are from the 8 combinations of treatments groups in the primary analysis. The plot shows the incidence rate ratio per person-year from a Poisson regression model with infection count across 3 years as the outcome adjusted for the fixed effects of age, sex, prior fall, body mass index, study site, and offset of log person-years. Error bars show 99% confidence intervals.

<sup>d</sup>Infections were assessed via questionnaire every 3 months and verified by an independent physician using all available information, including symptoms present, treatment received, and general practitioner diagnosis and hospitalization record, if available.

eFIGURE 2B.A: Subgroup analysis of systolic blood pressure by baseline 25(OH)D and DHA+EPA levels

| Group              | N <sup>a</sup> | Mean at baseline (99% CI) <sup>b</sup> |                      | Mean at 3 years (99% CI) <sup>b</sup> |                      | Absolute difference T3-BL (99% CI) <sup>b</sup> |                    | Adjusted difference (99% CI) <sup>c</sup> |                         |
|--------------------|----------------|----------------------------------------|----------------------|---------------------------------------|----------------------|-------------------------------------------------|--------------------|-------------------------------------------|-------------------------|
|                    |                | Treated   Non-treated                  | Treated              | Non-treated                           | Treated              | Non-treated                                     | Treated            | Non-treated                               | Treated vs. Non-Treated |
| <b>Vitamin D</b>   |                |                                        |                      |                                       |                      |                                                 |                    |                                           |                         |
| All                | 1076   1081    | 144.2 (142.7, 145.6)                   | 142.9 (141.5, 144.3) | 134.9 (133.3, 136.4)                  | 135.5 (134.0, 137.1) | -9.5 (-11.0, -8.0)                              | -7.6 (-9.2, -6.0)  | -0.8 (-2.1, 0.5)                          |                         |
| 25(OH)D <20 ng/ml  | 427   445      | 145.7 (143.4, 148.0)                   | 144.6 (142.4, 146.9) | 137.0 (134.5, 139.5)                  | 136.5 (134.0, 138.9) | -9.3 (-11.9, -6.7)                              | -8.0 (-10.6, -5.4) | -1.4 (-3.5, 0.8)                          |                         |
| 25(OH)D ≥20 ng/ml  | 639   629      | 142.8 (140.9, 144.7)                   | 141.7 (139.9, 143.6) | 133.6 (131.6, 135.5)                  | 134.8 (132.9, 136.8) | -9.5 (-11.4, -7.7)                              | -7.3 (-9.3, -5.3)  | -0.3 (-2.0, 1.3)                          |                         |
| <b>Omega-3</b>     |                |                                        |                      |                                       |                      |                                                 |                    |                                           |                         |
| All                | 1073   1084    | 143.2 (141.8, 144.6)                   | 143.9 (142.4, 145.3) | 134.3 (132.8, 135.8)                  | 136.1 (134.6, 137.6) | -9.0 (-10.6, -7.4)                              | -8.1 (-9.6, -6.6)  | -0.8 (-2.1, 0.5)                          |                         |
| DHA EPA <100µg/ml  | 528   540      | 143.4 (141.3, 145.5)                   | 144.1 (142.0, 146.2) | 134.6 (132.5, 136.8)                  | 136.6 (134.4, 138.8) | -8.4 (-10.6, -6.2)                              | -7.6 (-9.7, -5.5)  | -0.9 (-2.8, 0.9)                          |                         |
| DHA+EPA ≥100 µg/ml | 531   538      | 142.9 (140.8, 144.9)                   | 143.5 (141.5, 145.6) | 134.0 (131.8, 136.1)                  | 135.6 (133.4, 137.7) | -9.5 (-11.9, -7.1)                              | -8.5 (-10.7, -6.4) | -0.7 (-2.6, 1.2)                          |                         |

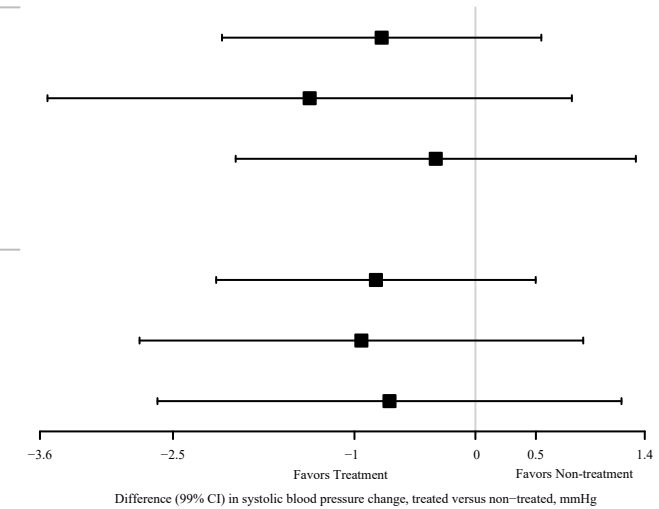

eFIGURE 2B.B: Subgroup analysis of infections by baseline 25(OH)D and DHA+EPA levels

| Group                 | N <sup>a</sup> | Number of infections <sup>d</sup> | Crude IR (99% CI) <sup>b</sup> |                   | Adjusted IRR (99% CI) <sup>c</sup> |                   |
|-----------------------|----------------|-----------------------------------|--------------------------------|-------------------|------------------------------------|-------------------|
|                       |                |                                   | Treated                        | Placebo           | Treated                            | Placebo           |
| <b>Vitamin D only</b> |                |                                   |                                |                   |                                    |                   |
| All                   | 272   270      | 786                               | 825                            | 1.04 (0.95, 1.14) | 1.10 (1.00, 1.20)                  | 0.95 (0.84, 1.08) |
| 25(OH)D <20 ng/ml     | 112   113      | 320                               | 329                            | 1.04 (0.90, 1.20) | 1.05 (0.91, 1.21)                  | 0.94 (0.77, 1.15) |
| 25(OH)D ≥20 ng/ml     | 159   155      | 464                               | 484                            | 1.04 (0.92, 1.17) | 1.12 (0.99, 1.26)                  | 0.96 (0.81, 1.14) |
| <b>Omega-3 only</b>   |                |                                   |                                |                   |                                    |                   |
| All                   | 269   270      | 716                               | 825                            | 0.97 (0.88, 1.06) | 1.10 (1.00, 1.20)                  | 0.89 (0.78, 1.01) |
| DHA+EPA <100 µg/ml    | 129   133      | 375                               | 398                            | 1.04 (0.91, 1.18) | 1.09 (0.96, 1.24)                  | 0.95 (0.79, 1.15) |
| DHA+EPA ≥100 µg/ml    | 138   135      | 335                               | 415                            | 0.90 (0.78, 1.03) | 1.08 (0.96, 1.23)                  | 0.82 (0.68, 0.99) |

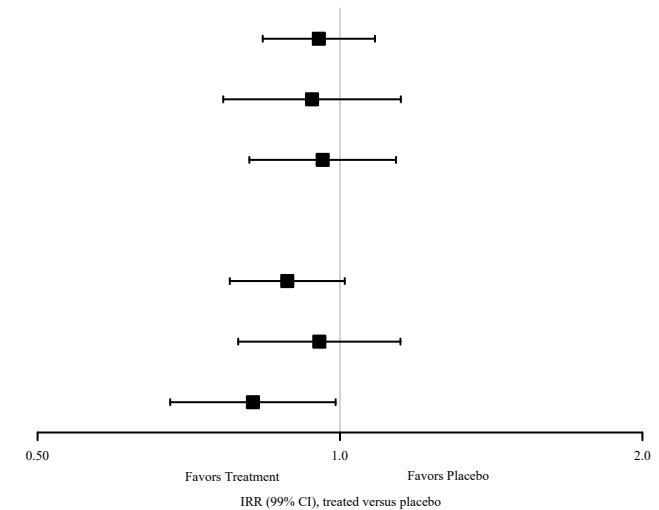

Supplement: jama-e2016909-s002.pdf [file jama-e2016909-s002.pdf]
