# Supplementary material
Source: PubMed Central journal article supplement (PMC7656284)
Supplement: jama-e2016909-s003.pdf [file jama-e2016909-s003.pdf]

Bischoff-Ferrari HA, Vellas B, Rizzoli R, et al; DO-HEALTH Research Group. Effect of vitamin D supplementation, omega-3 fatty acid supplementation, or a strength-training exercise program on clinical outcomes in older adults: the DO-HEALTH randomized clinical trial. *JAMA*. Published November 10, 2020. doi:10.1001/jama.2020.16909

## **Data Sharing Statement**

### **Data**

**Data available:** No
